# Supplementary material for: Structural phase transition and dielectric relaxation in an organic–inorganic hybrid compound: [(CH3)3NH]4[Fe(SCN)6]Cl
Source: Royal Society of Chemistry journal article supplement (doi:10.1039/d2ce01150f), 2022-01-01
Supplement: d2ce01150f1.pdf [file d2ce01150f1.pdf]

## Supporting information

### Structural phase transition and dielectric relaxation in an organic-inorganic hybrid compound: [(CH<sub>3</sub>)<sub>3</sub>NH]<sub>4</sub>[Fe(SCN)<sub>6</sub>]Cl

Ping Wang,<sup>a</sup> Ming-Kun Chen,<sup>b</sup> Yu-Qiao Tong,<sup>a</sup> Shi-Qing Yin<sup>a</sup> and Bo Huang\*<sup>a</sup>

<sup>a</sup>Faculty of Chemistry and Chemical Engineering, Yunnan Normal University, Kunming 650500, China.

<sup>b</sup>MOE Key Laboratory of Bioinorganic and Synthetic Chemistry, School of Chemistry, Sun Yat-Sen University, Guangzhou 510275, China.

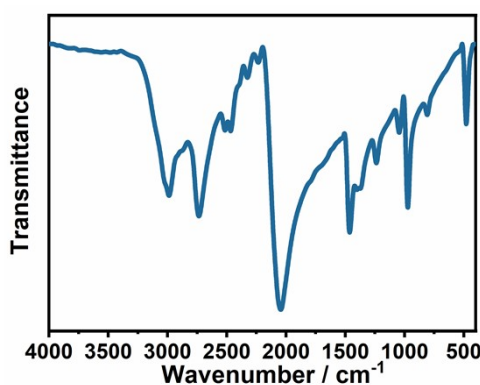

**Fig. S1** Infrared spectrum of **1** in KBr pellet recorded at room temperature.

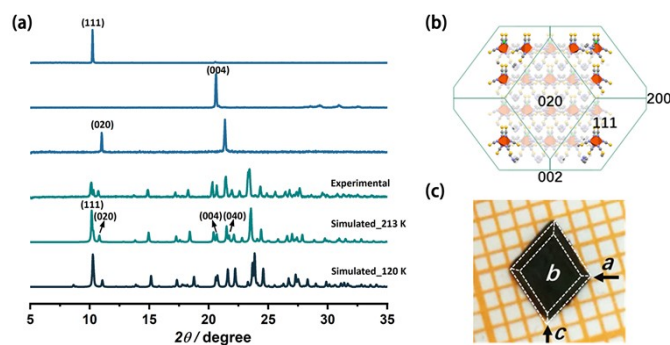

**Fig. S2** (a) The powder XRD patterns of **1** for the simulated at 120 and 213 K, experimental at room temperature and single crystals along different directions (020, 004 and 111). (b) The calculated BFDH morphology of **1** from Mercury. (c) The crystal picture of **1**. The *a*-, *b*- and *c*-axis were determined by XRD patterns and BFDH morphology.

**Table S1.** Summary of crystal data and structural refinements of **1** at 120 and 213 K.

|                                                                                          |                                                                             |                |
|------------------------------------------------------------------------------------------|-----------------------------------------------------------------------------|----------------|
| Empirical formula                                                                        | [(CH <sub>3</sub> ) <sub>3</sub> NH] <sub>4</sub> [Fe(SCN) <sub>6</sub> ]Cl |                |
| Formula weight                                                                           | 680.26                                                                      |                |
| Phase type                                                                               | LTP                                                                         | HTP            |
| <i>T</i> / K                                                                             | 120(2)                                                                      | 213(2)         |
| Space group                                                                              | <i>Pbn</i> 2 <sub>1</sub>                                                   | <i>Aba</i> 2   |
| <i>a</i> / Å                                                                             | 12.756(1)                                                                   | 12.806(2)      |
| <i>b</i> / Å                                                                             | 15.994(2)                                                                   | 16.361(3)      |
| <i>c</i> / Å                                                                             | 17.118(2)                                                                   | 17.171(3)      |
| <i>V</i> / Å <sup>3</sup>                                                                | 3492.3(5)                                                                   | 3597.4(11)     |
| <i>Z</i>                                                                                 | 4                                                                           | 4              |
| <i>D</i> <sub>calcd</sub> / g cm <sup>-3</sup>                                           | 1.294                                                                       | 1.256          |
| <i>μ</i> / mm <sup>-1</sup>                                                              | 0.892                                                                       | 0.866          |
| GOF                                                                                      | 1.090                                                                       | 1.058          |
| <i>R</i> <sub>1</sub> , <i>wR</i> <sub>2</sub> [ <i>I</i> > 2σ( <i>I</i> )] <sup>a</sup> | 0.0760, 0.2068                                                              | 0.0805, 0.2031 |
| <i>R</i> <sub>1</sub> , <i>wR</i> <sub>2</sub> (all data)                                | 0.1095, 0.2344                                                              | 0.1668, 0.2632 |
| Flack parameter                                                                          | -0.03(5)                                                                    | -0.08(8)       |

$${}^a R_1 = F_o - F_c / F_o, wR_2 = \{w[(F_o)^2 - (F_c)^2]^2 / w[(F_o)^2]^2\}^{1/2}$$

**Table S2.** The geometry (Å, °) of hydrogen bonds for **1** at 120 and 213 K.

|       | D–H⋯A                    | D–H   | H⋯A   | D⋯A   | ∠D–H⋯A |
|-------|--------------------------|-------|-------|-------|--------|
| 120 K | N7–H7⋯Cl1                | 0.980 | 2.210 | 3.157 | 162.17 |
|       | N8–H8⋯Cl1                | 0.980 | 2.226 | 3.142 | 155.04 |
|       | N9–H9⋯Cl1                | 0.980 | 2.146 | 3.113 | 168.98 |
| 213 K | N4–H4⋯Cl1 <sup>a</sup>   | 0.980 | 2.343 | 3.276 | 158.89 |
|       | N5–H5⋯Cl1 <sup>b</sup>   | 0.980 | 2.183 | 3.077 | 150.91 |
|       | N5'–H5'⋯Cl1 <sup>b</sup> | 0.980 | 2.256 | 3.209 | 163.85 |

Symmetry codes: <sup>a</sup>) *x*-1/2, -*y*, *z*+1/2; <sup>b</sup>) *x*-1, *y*, *z*

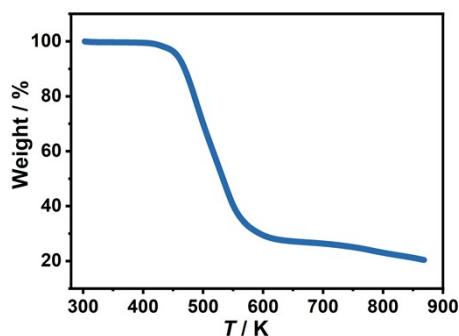

**Fig. S3** Thermogravimetric curve measured at a rate of  $5 \text{ K min}^{-1}$  under  $\text{N}_2$  atmosphere of **1**. It reveals that compound **1** was stable up to about 413 K.

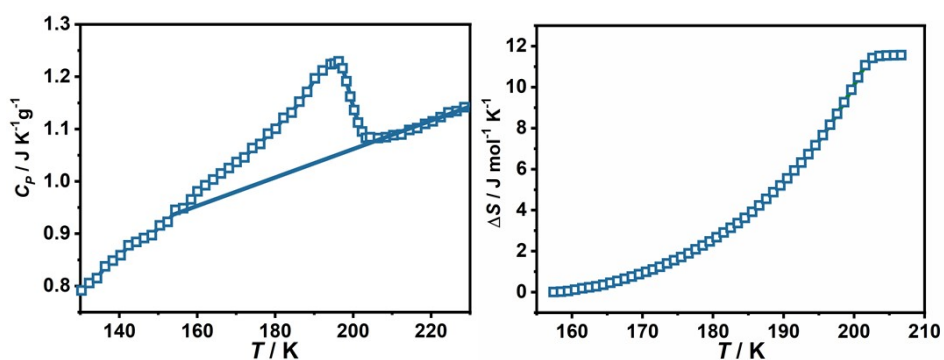

**Fig. S4** The baseline (left) and calculated  $\Delta S$  (right) related to the phase transition as a function of temperature.

**Table S3.** The relaxation time ( $\tau$ ) and distribution parameter ( $\alpha$ ) at 175, 180, 185 and 190 K along the  $a$ -,  $b$ - and  $c$ -axis for **1**.

|           | $T$                          | 175 K | 180 K | 185 K | 190 K |
|-----------|------------------------------|-------|-------|-------|-------|
| $a$ -axis | $\tau \times 10^6 \text{ s}$ | 0.80  | 0.53  | 0.27  | 0.14  |
|           | $\alpha$                     | 0.003 | 0.003 | 0.004 | 0.004 |
| $b$ -axis | $\tau \times 10^6 \text{ s}$ | 1.59  | 0.80  | 0.40  | 0.18  |
|           | $\alpha$                     | 0.007 | 0.007 | 0.009 | 0.008 |
| $c$ -axis | $\tau \times 10^6 \text{ s}$ | 8.85  | 2.27  | 0.94  | 0.32  |
|           | $\alpha$                     | 0.007 | 0.007 | 0.006 | 0.005 |
